# Supplementary material for: Quantum mechanical study on the oxidation of ethyl vinyl ketone initiated by an OH radical
Source: Royal Society of Chemistry journal article supplement (doi:10.1039/c8em00365c), 2018-01-01
Supplement: c8em00365c1.pdf [file c8em00365c1.pdf]

**Supplementary information**

**Quantum Mechanical study on the oxidation of ethyl vinyl ketone initiated by OH radical**

Subrata Paul, Nand Kishor Gour\* and Ramesh Chandra Deka\*

Department of Chemical Sciences, Tezpur University, Tezpur, Napaam 784028, Assam, India

Email addresses: [nkgour1@tezu.ernet.in](mailto:nkgour1@tezu.ernet.in) & [ramesh@tezu.ernet.in](mailto:ramesh@tezu.ernet.in)

Telephone: +91-9454352943

**Table S1:** Total energy with zero point correction and Relative Energy (R.E.) of all species at 298 K calculated at M06-2X/6-311++G(d,p) levels of theory .

| Species                                                  | $E_0$        | RE (in kcal mol <sup>-1</sup> ) |
|----------------------------------------------------------|--------------|---------------------------------|
| CH <sub>2</sub> CH(O)CH <sub>2</sub> CH <sub>3</sub> +OH | -346.013089  | 0                               |
| IM1                                                      | -346.0225852 | -5.96                           |
| IM2                                                      | -346.0151642 | -1.30                           |
| IM3                                                      | -346.0234857 | -6.52                           |
| IM4                                                      | -346.0225215 | -5.92                           |
| TS1a                                                     | -346.0056518 | 4.67                            |
| TS1b                                                     | -346.0107114 | 1.49                            |
| TS2                                                      | -346.0084696 | 2.89                            |
| TS3                                                      | -346.0119996 | 0.68                            |
| TS4a                                                     | -346.0092319 | 2.42                            |
| TS4b                                                     | -346.0144331 | -0.84                           |
| TS5                                                      | -346.0165714 | -2.19                           |
| TS6                                                      | -346.0169009 | -2.39                           |
| TS7                                                      | -346.0027648 | 6.48                            |

|                     |              |        |
|---------------------|--------------|--------|
| P1+H <sub>2</sub> O | -346.022031  | -5.61  |
| P2+H <sub>2</sub> O | -346.0294454 | -10.26 |
| P3+H <sub>2</sub> O | -346.0527014 | -24.86 |
| P4+H <sub>2</sub> O | -346.0377515 | -15.48 |
| P5                  | -346.0593327 | -29.01 |
| P6                  | -346.0738874 | -38.15 |
| P7                  | -346.0406261 | -17.28 |

**Table S2:** Harmonic vibrational frequency of all species obtained at M06-2X/6-311++G(d,p) level of theory

|     |      |      |      |      |      |      |      |      |      |      |      |      |
|-----|------|------|------|------|------|------|------|------|------|------|------|------|
| SC1 | 59   | 108  | 207  | 221  | 332  | 432  | 453  | 641  | 648  | 808  | 824  |      |
|     | 1007 | 1022 | 1028 | 1061 | 1089 | 1091 | 1152 | 1275 | 1325 | 1385 | 1424 |      |
|     | 1444 | 1462 | 1504 | 1508 | 1717 | 1840 | 3051 | 3085 | 3087 | 3165 | 3166 |      |
|     | 3169 | 3191 | 3266 |      |      |      |      |      |      |      |      |      |
| OH  | 3757 |      |      |      |      |      |      |      |      |      |      |      |
| IM1 | 8    | 60   | 83   | 115  | 158  | 233  | 243  | 340  | 416  | 444  | 444  | 527  |
|     | 644  | 651  | 814  | 837  | 1010 | 1026 | 1035 | 1068 | 1091 | 1098 | 1157 | 1281 |
|     | 1326 | 1392 | 1430 | 1455 | 1462 | 1504 | 1510 | 1714 | 1819 | 3059 | 3086 | 3094 |
|     | 3165 | 3174 | 3178 | 3201 | 3273 | 3642 |      |      |      |      |      |      |
| IM2 | 34   | 45   | 91   | 123  | 133  | 190  | 216  | 303  | 309  | 337  | 432  | 461  |
|     | 643  | 656  | 811  | 833  | 1012 | 1031 | 1037 | 1063 | 1091 | 1095 | 1155 | 1280 |
|     | 1329 | 1386 | 1421 | 1449 | 1464 | 1513 | 1516 | 1724 | 1836 | 3055 | 3071 | 3094 |
|     | 3153 | 3160 | 3186 | 3210 | 3284 | 3771 |      |      |      |      |      |      |
| IM3 | 25   | 66   | 105  | 124  | 165  | 224  | 300  | 344  | 430  | 446  | 529  | 543  |
|     | 645  | 646  | 813  | 827  | 1008 | 1018 | 1027 | 1064 | 1090 | 1093 | 1155 | 1276 |
|     | 1324 | 1387 | 1423 | 1444 | 1459 | 1506 | 1527 | 1719 | 1818 | 3053 | 3077 | 3089 |
|     | 3158 | 3159 | 3170 | 3191 | 3271 | 3626 |      |      |      |      |      |      |

|      |              |      |      |      |      |      |      |      |      |      |      |      |
|------|--------------|------|------|------|------|------|------|------|------|------|------|------|
| IM4  | 28           | 63   | 86   | 112  | 162  | 197  | 232  | 344  | 427  | 456  | 513  | 579  |
|      | 644          | 653  | 814  | 831  | 1008 | 1029 | 1045 | 1067 | 1088 | 1097 | 1156 | 1277 |
|      | 1329         | 1389 | 1425 | 1457 | 1459 | 1497 | 1505 | 1716 | 1826 | 3050 | 3079 | 3085 |
|      | 3161         | 3163 | 3173 | 3196 | 3271 | 3639 |      |      |      |      |      |      |
| TS1a | <b>1408i</b> | 43   | 60   | 85   | 103  | 171  | 188  | 198  | 288  | 387  | 463  | 563  |
|      | 640          | 757  | 803  | 829  | 856  | 974  | 997  | 1037 | 1060 | 1086 | 1140 | 1245 |
|      | 1270         | 1277 | 1305 | 1387 | 1421 | 1459 | 1495 | 1503 | 1700 | 1844 | 3049 | 3076 |
|      | 3085         | 3159 | 3161 | 3189 | 3222 | 3804 |      |      |      |      |      |      |
| TS1b | <b>1634i</b> | 46   | 71   | 158  | 172  | 204  | 223  | 332  | 413  | 435  | 514  | 606  |
|      | 619          | 667  | 773  | 812  | 880  | 900  | 957  | 1007 | 1064 | 1086 | 1091 | 1144 |
|      | 1270         | 1307 | 1386 | 1419 | 1457 | 1464 | 1495 | 1502 | 1695 | 1833 | 3049 | 3079 |
|      | 3084         | 3149 | 3161 | 3165 | 3217 | 3713 |      |      |      |      |      |      |
| TS2  | <b>1120i</b> | 43   | 63   | 80   | 169  | 192  | 205  | 223  | 308  | 423  | 431  | 555  |
|      | 630          | 695  | 781  | 814  | 849  | 1002 | 1008 | 1030 | 1078 | 1090 | 1127 | 1237 |
|      | 1272         | 1302 | 1391 | 1416 | 1428 | 1450 | 1501 | 1507 | 1715 | 1843 | 3057 | 3077 |
|      | 3090         | 3157 | 3158 | 3161 | 3260 | 3818 |      |      |      |      |      |      |
| TS3  | <b>817i</b>  | 45   | 60   | 82   | 133  | 184  | 203  | 210  | 327  | 428  | 455  | 602  |
|      | 648          | 763  | 810  | 854  | 991  | 1025 | 1028 | 1042 | 1067 | 1090 | 1139 | 1205 |
|      | 1315         | 1338 | 1390 | 1419 | 1439 | 1451 | 1493 | 1497 | 1718 | 1830 | 3072 | 3098 |
|      | 3148         | 3168 | 3176 | 3204 | 3274 | 3778 |      |      |      |      |      |      |
| TS4a | <b>805i</b>  | 54   | 58   | 70   | 127  | 170  | 193  | 304  | 342  | 421  | 454  | 634  |
|      | 647          | 719  | 818  | 843  | 978  | 1025 | 1034 | 1059 | 1080 | 1086 | 1135 | 1254 |
|      | 1281         | 1328 | 1335 | 1374 | 1395 | 1443 | 1457 | 1483 | 1722 | 1837 | 3058 | 3098 |
|      | 3128         | 3174 | 3200 | 3206 | 3274 | 3785 |      |      |      |      |      |      |
| TS4b | <b>1146i</b> | 48   | 85   | 143  | 159  | 201  | 322  | 341  | 429  | 454  | 468  | 631  |
|      | 647          | 752  | 817  | 884  | 949  | 1025 | 1026 | 1032 | 1075 | 1087 | 1095 | 1162 |
|      | 1248         | 1321 | 1327 | 1394 | 1442 | 1445 | 1462 | 1467 | 1718 | 1824 | 3049 | 3087 |
|      | 3112         | 3172 | 3189 | 3199 | 3273 | 3742 |      |      |      |      |      |      |
| TS5  | <b>419i</b>  | 57   | 90   | 136  | 186  | 206  | 226  | 294  | 329  | 431  | 494  | 622  |
|      | 642          | 735  | 806  | 815  | 986  | 1006 | 1015 | 1056 | 1086 | 1092 | 1147 | 1278 |
|      | 1301         | 1382 | 1423 | 1444 | 1463 | 1500 | 1505 | 1627 | 1844 | 3055 | 3080 | 3102 |
|      | 3162         | 3163 | 3186 | 3217 | 3297 | 3781 |      |      |      |      |      |      |
| TS6  | <b>412i</b>  | 51   | 60   | 108  | 191  | 201  | 244  | 332  | 423  | 440  | 521  | 634  |
|      | 690          | 759  | 810  | 829  | 978  | 1005 | 1019 | 1054 | 1081 | 1102 | 1156 | 1277 |



**Table S3:** Cartesian coordinates of all species (in Å) at M06-2X/6-311++G(d,p) level of theory**EVK (SC1)**

| At. No.(Z) | X            | Y            | Z            |
|------------|--------------|--------------|--------------|
| 6          | 2.556096000  | 0.015187000  | 0.000309000  |
| 1          | 3.508722000  | -0.504047000 | 0.000351000  |
| 1          | 2.557831000  | 1.102012000  | 0.000724000  |
| 6          | 1.396743000  | -0.642404000 | -0.000224000 |
| 1          | 1.359480000  | -1.729710000 | -0.000683000 |
| 6          | 0.093789000  | 0.096126000  | -0.000160000 |
| 8          | 0.048801000  | 1.309913000  | -0.000253000 |
| 6          | -1.159273000 | -0.755807000 | 0.000018000  |
| 6          | -2.440820000 | 0.063722000  | 0.000198000  |
| 1          | -1.104776000 | -1.419905000 | 0.873752000  |
| 1          | -1.104976000 | -1.419877000 | -0.873749000 |
| 1          | -3.317399000 | -0.588279000 | 0.000313000  |
| 1          | -2.484136000 | 0.709746000  | 0.880008000  |
| 1          | -2.484368000 | 0.709812000  | -0.879546000 |

**TS1a**

| At. No.(Z) | X            | Y            | Z            |
|------------|--------------|--------------|--------------|
| 6          | 1.723062000  | 0.554187000  | -0.144395000 |
| 1          | 2.847956000  | 0.099149000  | -0.234905000 |
| 1          | 1.647123000  | 1.638571000  | -0.148195000 |
| 6          | 0.707918000  | -0.292828000 | -0.063630000 |
| 1          | 0.870631000  | -1.368936000 | -0.062968000 |
| 6          | -0.711288000 | 0.207721000  | 0.000737000  |
| 8          | -0.966028000 | 1.390921000  | 0.068437000  |
| 6          | -1.786915000 | -0.857464000 | -0.030292000 |
| 6          | -3.194245000 | -0.285226000 | 0.043871000  |
| 1          | -1.587197000 | -1.551365000 | 0.797830000  |
| 1          | -1.636228000 | -1.445815000 | -0.946023000 |
| 1          | -3.937472000 | -1.085096000 | 0.008755000  |

|   |              |              |              |
|---|--------------|--------------|--------------|
| 1 | -3.331954000 | 0.280672000  | 0.968094000  |
| 1 | -3.375944000 | 0.399582000  | -0.787523000 |
| 1 | 4.022086000  | -0.360695000 | 0.972678000  |
| 8 | 3.972254000  | -0.461471000 | 0.005877000  |

---

### TS1b

| At. No.(Z) | X            | Y            | Z            |
|------------|--------------|--------------|--------------|
| 6          | -1.905810000 | 1.117808000  | 0.000115000  |
| 1          | -2.657908000 | 1.902248000  | 0.000299000  |
| 1          | -2.419062000 | -0.019591000 | 0.000301000  |
| 6          | -0.591196000 | 1.292088000  | -0.000313000 |
| 1          | -0.178799000 | 2.301970000  | -0.000581000 |
| 6          | 0.399832000  | 0.169158000  | -0.000260000 |
| 8          | 0.063743000  | -1.000581000 | -0.000578000 |
| 6          | 1.856418000  | 0.576771000  | 0.000350000  |
| 6          | 2.810713000  | -0.607542000 | 0.000155000  |
| 1          | 2.013601000  | 1.223845000  | 0.874461000  |
| 1          | 2.014194000  | 1.224620000  | -0.873074000 |
| 1          | 3.847928000  | -0.265351000 | 0.000823000  |
| 1          | 2.647722000  | -1.234013000 | 0.880034000  |
| 1          | 2.648559000  | -1.233053000 | -0.880567000 |
| 1          | -1.847640000 | -1.578300000 | 0.000040000  |
| 8          | -2.749785000 | -1.200928000 | 0.000327000  |

---

### TS2

| At. No.(Z) | X            | Y            | Z            |
|------------|--------------|--------------|--------------|
| 6          | 1.954015000  | 1.427229000  | -0.066485000 |
| 1          | 3.028793000  | 1.292262000  | -0.136006000 |
| 1          | 1.559656000  | 2.439066000  | 0.010715000  |
| 6          | 1.114936000  | 0.400364000  | -0.084171000 |
| 1          | 1.538382000  | -0.718348000 | -0.202371000 |
| 6          | -0.380651000 | 0.503595000  | 0.003856000  |
| 8          | -0.902888000 | 1.590252000  | 0.136177000  |

|   |              |              |              |
|---|--------------|--------------|--------------|
| 6 | -1.155337000 | -0.786940000 | -0.088308000 |
| 6 | -2.660287000 | -0.586041000 | -0.000541000 |
| 1 | -0.779847000 | -1.451282000 | 0.701540000  |
| 1 | -0.858685000 | -1.278163000 | -1.025199000 |
| 1 | -3.179300000 | -1.544663000 | -0.068851000 |
| 1 | -2.932648000 | -0.106927000 | 0.942886000  |
| 1 | -3.012484000 | 0.060218000  | -0.807974000 |
| 1 | 2.431924000  | -1.794335000 | 0.878734000  |
| 8 | 2.023907000  | -1.921135000 | 0.003875000  |

---

**TS3**

| <b>At. No.(Z)</b> | <b>X</b>     | <b>Y</b>     | <b>Z</b>     |
|-------------------|--------------|--------------|--------------|
| 6                 | 2.753167000  | 0.249266000  | 0.055271000  |
| 1                 | 3.566534000  | 0.896251000  | 0.366231000  |
| 1                 | 2.981695000  | -0.593952000 | -0.591117000 |
| 6                 | 1.496799000  | 0.464910000  | 0.445418000  |
| 1                 | 1.230987000  | 1.299662000  | 1.089555000  |
| 6                 | 0.394766000  | -0.443731000 | 0.006910000  |
| 8                 | 0.568588000  | -1.328623000 | -0.809245000 |
| 6                 | -0.962987000 | -0.192855000 | 0.616702000  |
| 6                 | -2.042662000 | -1.165039000 | 0.197303000  |
| 1                 | -1.242102000 | 0.888892000  | 0.284539000  |
| 1                 | -0.875465000 | -0.072302000 | 1.703772000  |
| 1                 | -3.011056000 | -0.867839000 | 0.605048000  |
| 1                 | -2.114379000 | -1.220116000 | -0.891444000 |
| 1                 | -1.805646000 | -2.171608000 | 0.555464000  |
| 1                 | -1.416631000 | 1.822754000  | -1.325667000 |
| 8                 | -1.462142000 | 2.146492000  | -0.406505000 |

---

**TS4a**

| <b>At. No.(Z)</b> | <b>X</b>     | <b>Y</b>     | <b>Z</b>     |
|-------------------|--------------|--------------|--------------|
| 6                 | -3.251477000 | -0.428694000 | -0.037642000 |
| 1                 | -4.066220000 | -1.145026000 | -0.040133000 |



|   |              |              |              |
|---|--------------|--------------|--------------|
| 1 | -3.492751000 | 0.630558000  | -0.068252000 |
| 6 | -1.976556000 | -0.815301000 | 0.002090000  |
| 1 | -1.700542000 | -1.866974000 | 0.034050000  |
| 6 | -0.869860000 | 0.191741000  | 0.005160000  |
| 8 | -1.086965000 | 1.385792000  | -0.036693000 |
| 6 | 0.539537000  | -0.369859000 | 0.062704000  |
| 6 | 1.602445000  | 0.704325000  | 0.073268000  |
| 1 | 0.667672000  | -1.044265000 | -0.794551000 |
| 1 | 0.610892000  | -1.008335000 | 0.953102000  |
| 1 | 2.629768000  | 0.140540000  | 0.102293000  |
| 1 | 1.591024000  | 1.322958000  | -0.825525000 |
| 1 | 1.573505000  | 1.333126000  | 0.964753000  |
| 1 | 4.353521000  | 0.017827000  | -0.455599000 |
| 8 | 3.783040000  | -0.645002000 | -0.026259000 |

---

**TS4b**

| <b>At. No.(Z)</b> | <b>X</b>     | <b>Y</b>     | <b>Z</b>     |
|-------------------|--------------|--------------|--------------|
| 6                 | 2.892081000  | -0.481056000 | -0.066727000 |
| 1                 | 3.920637000  | -0.301183000 | -0.360932000 |
| 1                 | 2.652340000  | -1.416050000 | 0.432472000  |
| 6                 | 1.929248000  | 0.410886000  | -0.300694000 |
| 1                 | 2.135580000  | 1.356381000  | -0.796814000 |
| 6                 | 0.520400000  | 0.141970000  | 0.114367000  |
| 8                 | 0.203365000  | -0.899373000 | 0.660462000  |
| 6                 | -0.488699000 | 1.231781000  | -0.187108000 |
| 6                 | -1.863294000 | 0.963845000  | 0.379011000  |
| 1                 | -0.524240000 | 1.348855000  | -1.279115000 |
| 1                 | -0.078437000 | 2.177248000  | 0.197274000  |
| 1                 | -2.596888000 | 1.723360000  | 0.103563000  |
| 1                 | -2.285821000 | -0.044919000 | -0.103792000 |
| 1                 | -1.859316000 | 0.785195000  | 1.455471000  |
| 1                 | -1.646049000 | -1.659261000 | -0.072211000 |
| 8                 | -2.410392000 | -1.297399000 | -0.561588000 |

---

**TS5**

---

| <b>At. No.(Z)</b> | <b>X</b>     | <b>Y</b>     | <b>Z</b>     |
|-------------------|--------------|--------------|--------------|
| 6                 | 2.223062000  | -0.801082000 | 0.343182000  |
| 1                 | 3.185007000  | -0.642002000 | 0.816039000  |
| 1                 | 2.138545000  | -1.550887000 | -0.438718000 |
| 6                 | 1.137841000  | -0.065265000 | 0.681429000  |
| 1                 | 1.170448000  | 0.628984000  | 1.515414000  |
| 6                 | -0.202675000 | -0.359905000 | 0.062427000  |
| 8                 | -0.302696000 | -1.149038000 | -0.854442000 |
| 6                 | -1.379510000 | 0.388880000  | 0.638486000  |
| 6                 | -2.685945000 | 0.093837000  | -0.082742000 |
| 1                 | -1.122374000 | 1.455261000  | 0.601647000  |
| 1                 | -1.440832000 | 0.131217000  | 1.705293000  |
| 1                 | -3.511054000 | 0.645103000  | 0.374133000  |
| 1                 | -2.616347000 | 0.379061000  | -1.135078000 |
| 1                 | -2.915868000 | -0.973592000 | -0.047963000 |
| 1                 | 1.593057000  | 1.068321000  | -1.442842000 |
| 8                 | 1.423043000  | 1.564007000  | -0.621135000 |

---

**TS6**

---

| <b>At. No.(Z)</b> | <b>X</b>     | <b>Y</b>     | <b>Z</b>     |
|-------------------|--------------|--------------|--------------|
| 6                 | -1.966668000 | 0.694097000  | 0.639301000  |
| 1                 | -2.853025000 | 1.304529000  | 0.516841000  |
| 1                 | -1.956203000 | -0.025486000 | 1.451523000  |
| 6                 | -0.836254000 | 0.938151000  | -0.065391000 |
| 1                 | -0.795297000 | 1.727583000  | -0.810903000 |
| 6                 | 0.363746000  | 0.081147000  | 0.129949000  |
| 8                 | 0.261363000  | -1.021969000 | 0.641285000  |
| 6                 | 1.689307000  | 0.629967000  | -0.348591000 |
| 6                 | 2.858402000  | -0.304939000 | -0.077542000 |
| 1                 | 1.834598000  | 1.609734000  | 0.125893000  |
| 1                 | 1.582224000  | 0.839267000  | -1.421997000 |
| 1                 | 3.790684000  | 0.127607000  | -0.447610000 |

---

|   |              |              |              |
|---|--------------|--------------|--------------|
| 1 | 2.961705000  | -0.494086000 | 0.993441000  |
| 1 | 2.701662000  | -1.269662000 | -0.565075000 |
| 8 | -2.523732000 | -0.807711000 | -0.771183000 |
| 1 | -1.818592000 | -1.412579000 | -0.469290000 |

---

### TS7

| At. No.(Z) | X            | Y            | Z            |
|------------|--------------|--------------|--------------|
| 6          | 2.564763000  | -0.393727000 | 0.194674000  |
| 1          | 3.515554000  | -0.695062000 | -0.231856000 |
| 1          | 2.552804000  | -0.015359000 | 1.212741000  |
| 6          | 1.433697000  | -0.475529000 | -0.500713000 |
| 1          | 1.409639000  | -0.850847000 | -1.520740000 |
| 6          | 0.119013000  | -0.095335000 | 0.107989000  |
| 8          | 0.089198000  | 0.511437000  | 1.212724000  |
| 6          | -1.082354000 | -0.890618000 | -0.365977000 |
| 6          | -2.409067000 | -0.383169000 | 0.179528000  |
| 1          | -0.899451000 | -1.923604000 | -0.037715000 |
| 1          | -1.074096000 | -0.902648000 | -1.460509000 |
| 1          | -3.225747000 | -1.041224000 | -0.126359000 |
| 1          | -2.386398000 | -0.337126000 | 1.270413000  |
| 1          | -2.623112000 | 0.619268000  | -0.200981000 |
| 1          | -0.607069000 | 2.097090000  | -0.113803000 |
| 8          | -0.141504000 | 1.548535000  | -0.773249000 |

---

### IM1

| At. No.(Z) | X            | Y            | Z            |
|------------|--------------|--------------|--------------|
| 6          | -1.715442000 | 1.552165000  | 0.000514000  |
| 1          | -2.272896000 | 2.482965000  | 0.000326000  |
| 1          | -2.287175000 | 0.627449000  | 0.001522000  |
| 6          | -0.381810000 | 1.542983000  | -0.000415000 |
| 1          | 0.185153000  | 2.471108000  | -0.001314000 |
| 6          | 0.404333000  | 0.274988000  | -0.000086000 |
| 8          | -0.126614000 | -0.823039000 | 0.000309000  |

|   |              |              |              |
|---|--------------|--------------|--------------|
| 6 | 1.909191000  | 0.418454000  | -0.000175000 |
| 6 | 2.643082000  | -0.913564000 | 0.000155000  |
| 1 | 2.177540000  | 1.029149000  | 0.872885000  |
| 1 | 2.177522000  | 1.028720000  | -0.873536000 |
| 1 | 3.723963000  | -0.756825000 | 0.000271000  |
| 1 | 2.374566000  | -1.501898000 | 0.880460000  |
| 1 | 2.374816000  | -1.502206000 | -0.880022000 |
| 1 | -1.860274000 | -1.567924000 | -0.000145000 |
| 8 | -2.842054000 | -1.622048000 | -0.000359000 |

---

### IM2

| At. No.(Z) | X            | Y            | Z            |
|------------|--------------|--------------|--------------|
| 6          | 3.049113000  | 0.636134000  | -0.225356000 |
| 1          | 3.827318000  | 1.372276000  | -0.053665000 |
| 1          | 3.284288000  | -0.234173000 | -0.832163000 |
| 6          | 1.826028000  | 0.774443000  | 0.285593000  |
| 1          | 1.558866000  | 1.633413000  | 0.897211000  |
| 6          | 0.765879000  | -0.253190000 | 0.034661000  |
| 8          | 0.978004000  | -1.232206000 | -0.653705000 |
| 6          | -0.577854000 | 0.000473000  | 0.682967000  |
| 6          | -1.594637000 | -1.093119000 | 0.394614000  |
| 1          | -0.937739000 | 0.977965000  | 0.334566000  |
| 1          | -0.408770000 | 0.117361000  | 1.762261000  |
| 1          | -2.553554000 | -0.860551000 | 0.866735000  |
| 1          | -1.738243000 | -1.205597000 | -0.684136000 |
| 1          | -1.246502000 | -2.058792000 | 0.769417000  |
| 1          | -3.676686000 | 0.541438000  | -1.152031000 |
| 8          | -3.343023000 | 1.148233000  | -0.464179000 |

---

### IM3

| At. No.(Z) | X           | Y            | Z           |
|------------|-------------|--------------|-------------|
| 6          | 2.808621000 | -0.837872000 | 0.000050000 |
| 1          | 3.892262000 | -0.789261000 | 0.000779000 |

|   |              |              |              |
|---|--------------|--------------|--------------|
| 1 | 2.334717000  | -1.815850000 | -0.001355000 |
| 6 | 2.057480000  | 0.263560000  | 0.000810000  |
| 1 | 2.500591000  | 1.256605000  | 0.002187000  |
| 6 | 0.567605000  | 0.175333000  | -0.000205000 |
| 8 | 0.000818000  | -0.904975000 | -0.001435000 |
| 6 | -0.186553000 | 1.485057000  | 0.000207000  |
| 6 | -1.699718000 | 1.328983000  | -0.000487000 |
| 1 | 0.160318000  | 2.055711000  | -0.872516000 |
| 1 | 0.159604000  | 2.054937000  | 0.873706000  |
| 1 | -2.184975000 | 2.307512000  | -0.000687000 |
| 1 | -2.038019000 | 0.780526000  | -0.884013000 |
| 1 | -2.038761000 | 0.780531000  | 0.882763000  |
| 1 | -1.805735000 | -1.449660000 | 0.000094000  |
| 8 | -2.783895000 | -1.553952000 | 0.001033000  |

#### IM4

| At. No.(Z) | X            | Y            | Z            |
|------------|--------------|--------------|--------------|
| 6          | -1.728063000 | 1.522686000  | 0.120778000  |
| 1          | -2.302774000 | 2.441257000  | 0.062668000  |
| 1          | -2.266062000 | 0.607857000  | 0.358719000  |
| 6          | -0.409551000 | 1.518247000  | -0.082215000 |
| 1          | 0.128176000  | 2.437698000  | -0.302234000 |
| 6          | 0.399683000  | 0.268237000  | 0.003767000  |
| 8          | -0.110949000 | -0.831550000 | 0.140563000  |
| 6          | 1.899769000  | 0.430757000  | -0.085627000 |
| 6          | 2.658447000  | -0.882209000 | 0.030952000  |
| 1          | 2.199096000  | 1.143653000  | 0.694944000  |
| 1          | 2.112693000  | 0.937692000  | -1.037188000 |
| 1          | 3.734569000  | -0.712355000 | -0.047478000 |
| 1          | 2.449874000  | -1.365577000 | 0.988175000  |
| 1          | 2.354962000  | -1.574588000 | -0.757504000 |
| 8          | -2.824272000 | -1.609558000 | -0.125483000 |
| 1          | -1.850468000 | -1.533084000 | -0.006671000 |

**P1**

---

| <b>At. No.(Z)</b> | <b>X</b>     | <b>Y</b>     | <b>Z</b>     |
|-------------------|--------------|--------------|--------------|
| 6                 | -2.625142000 | -0.059105000 | 0.000051000  |
| 1                 | -2.939773000 | 0.976263000  | -0.000066000 |
| 6                 | -1.461472000 | -0.673368000 | 0.000105000  |
| 1                 | -1.398123000 | -1.761288000 | 0.000230000  |
| 6                 | -0.164289000 | 0.096299000  | -0.000006000 |
| 8                 | -0.137054000 | 1.308178000  | -0.000157000 |
| 6                 | 1.095726000  | -0.746296000 | 0.000090000  |
| 6                 | 2.368316000  | 0.087286000  | -0.000068000 |
| 1                 | 1.046833000  | -1.409846000 | -0.874075000 |
| 1                 | 1.046874000  | -1.409578000 | 0.874461000  |
| 1                 | 3.250951000  | -0.556428000 | 0.000008000  |
| 1                 | 2.405395000  | 0.733146000  | -0.880187000 |
| 1                 | 2.405439000  | 0.733415000  | 0.879851000  |

---

**P2**

---

| <b>At. No.(Z)</b> | <b>X</b>     | <b>Y</b>     | <b>Z</b>     |
|-------------------|--------------|--------------|--------------|
| 6                 | -2.695520000 | -0.383876000 | 0.000156000  |
| 1                 | -3.247536000 | -0.523554000 | -0.929688000 |
| 1                 | -3.247231000 | -0.523661000 | 0.930163000  |
| 6                 | -1.439558000 | -0.053355000 | -0.000016000 |
| 6                 | -0.072115000 | 0.311606000  | -0.000111000 |
| 8                 | 0.264411000  | 1.499922000  | -0.000064000 |
| 6                 | 0.943552000  | -0.823171000 | -0.000289000 |
| 6                 | 2.375775000  | -0.306069000 | 0.000267000  |
| 1                 | 0.748724000  | -1.454172000 | -0.876175000 |
| 1                 | 0.748277000  | -1.454944000 | 0.874931000  |
| 1                 | 3.081287000  | -1.140436000 | -0.000134000 |
| 1                 | 2.564324000  | 0.313840000  | -0.879126000 |
| 1                 | 2.564062000  | 0.312734000  | 0.880499000  |

---

**P3**

| At. No.(Z) | X            | Y            | Z            |
|------------|--------------|--------------|--------------|
| 6          | -2.180553000 | -0.795563000 | 0.000036000  |
| 1          | -2.738615000 | -1.725749000 | 0.000010000  |
| 1          | -2.731409000 | 0.140855000  | 0.000114000  |
| 6          | -0.847392000 | -0.778888000 | -0.000054000 |
| 1          | -0.278994000 | -1.705173000 | -0.000144000 |
| 6          | -0.099873000 | 0.516765000  | -0.000006000 |
| 8          | -0.702845000 | 1.598069000  | -0.000007000 |
| 6          | 1.340366000  | 0.497002000  | 0.000025000  |
| 6          | 2.181244000  | -0.734188000 | 0.000026000  |
| 1          | 1.808923000  | 1.476165000  | -0.000081000 |
| 1          | 3.243324000  | -0.486707000 | -0.000205000 |
| 1          | 1.978564000  | -1.357279000 | 0.880367000  |
| 1          | 1.978209000  | -1.357423000 | -0.880161000 |

#### P4

| At. No.(Z) | X            | Y            | Z            |
|------------|--------------|--------------|--------------|
| 6          | 2.496169000  | -0.008293000 | -0.000034000 |
| 1          | 3.439693000  | -0.543707000 | -0.000130000 |
| 1          | 2.516451000  | 1.078290000  | 0.000104000  |
| 6          | 1.326083000  | -0.646928000 | -0.000092000 |
| 1          | 1.271117000  | -1.733488000 | -0.000228000 |
| 6          | 0.037262000  | 0.112634000  | 0.000024000  |
| 8          | 0.008044000  | 1.325635000  | 0.000050000  |
| 6          | -1.225939000 | -0.730644000 | 0.000201000  |
| 6          | -2.481788000 | 0.058559000  | -0.000346000 |
| 1          | -1.162535000 | -1.406833000 | 0.869893000  |
| 1          | -1.162361000 | -1.407694000 | -0.868786000 |
| 1          | -3.440419000 | -0.442666000 | -0.000038000 |
| 1          | -2.437019000 | 1.139044000  | 0.000273000  |

#### P5

| At. No.(Z) | X | Y | Z |
|------------|---|---|---|
|------------|---|---|---|

|   |              |              |              |
|---|--------------|--------------|--------------|
| 6 | -2.208865000 | 0.792518000  | -0.312610000 |
| 1 | -3.254331000 | 0.508426000  | -0.316225000 |
| 1 | -1.913881000 | 1.791369000  | -0.604523000 |
| 6 | -1.227989000 | -0.102541000 | 0.353552000  |
| 1 | -1.351484000 | -0.059370000 | 1.450210000  |
| 6 | 0.219450000  | 0.364084000  | 0.111528000  |
| 8 | 0.472897000  | 1.548535000  | 0.102810000  |
| 6 | 1.275238000  | -0.704560000 | -0.050070000 |
| 6 | 2.682782000  | -0.130699000 | -0.116269000 |
| 1 | 1.027751000  | -1.279065000 | -0.952036000 |
| 1 | 1.151589000  | -1.421450000 | 0.771293000  |
| 1 | 3.418058000  | -0.929435000 | -0.237722000 |
| 1 | 2.779873000  | 0.564090000  | -0.953653000 |
| 1 | 2.918958000  | 0.424545000  | 0.794740000  |
| 1 | -1.647483000 | -1.531481000 | -0.908915000 |
| 8 | -1.419490000 | -1.471090000 | 0.027195000  |

---

**P6**

| <b>At. No.(Z)</b> | <b>X</b>     | <b>Y</b>     | <b>Z</b>     |
|-------------------|--------------|--------------|--------------|
| 6                 | -2.167273000 | 0.484461000  | 0.213364000  |
| 1                 | -2.882880000 | 1.205756000  | -0.190817000 |
| 1                 | -2.357734000 | 0.425525000  | 1.301556000  |
| 6                 | -0.772291000 | 0.990555000  | 0.017328000  |
| 1                 | -0.602896000 | 2.059394000  | -0.082479000 |
| 6                 | 0.368838000  | 0.104371000  | 0.071129000  |
| 8                 | 0.217457000  | -1.100378000 | 0.304179000  |
| 6                 | 1.749287000  | 0.695489000  | -0.152576000 |
| 6                 | 2.858106000  | -0.342058000 | -0.048488000 |
| 1                 | 1.894071000  | 1.504017000  | 0.575785000  |
| 1                 | 1.750729000  | 1.179041000  | -1.138319000 |
| 1                 | 3.833681000  | 0.121364000  | -0.212650000 |
| 1                 | 2.855311000  | -0.813718000 | 0.936892000  |
| 1                 | 2.716835000  | -1.133264000 | -0.788154000 |
| 8                 | -2.430280000 | -0.747922000 | -0.411212000 |



|   |              |              |              |
|---|--------------|--------------|--------------|
| 1 | -1.724539000 | -1.358622000 | -0.150093000 |
|---|--------------|--------------|--------------|

---

**P7**

| <b>At. No.(Z)</b> | <b>X</b>     | <b>Y</b>     | <b>Z</b>     |
|-------------------|--------------|--------------|--------------|
| 6                 | 2.427092000  | -0.657093000 | 0.005779000  |
| 1                 | 3.392309000  | -0.780930000 | -0.473503000 |
| 1                 | 2.258880000  | -1.164461000 | 0.951011000  |
| 6                 | 1.483789000  | 0.098611000  | -0.544383000 |
| 1                 | 1.630042000  | 0.629500000  | -1.481809000 |
| 6                 | 0.101144000  | 0.291697000  | 0.059791000  |
| 8                 | 0.097128000  | 0.082242000  | 1.392574000  |
| 6                 | -0.884093000 | -0.780066000 | -0.528091000 |
| 6                 | -2.323091000 | -0.599510000 | -0.059728000 |
| 1                 | -0.492260000 | -1.765693000 | -0.264882000 |
| 1                 | -0.810057000 | -0.659333000 | -1.613987000 |
| 1                 | -2.967445000 | -1.341266000 | -0.538929000 |
| 1                 | -2.411020000 | -0.723727000 | 1.022827000  |
| 1                 | -2.701164000 | 0.389694000  | -0.332316000 |
| 1                 | -0.922569000 | 1.902575000  | 0.389627000  |
| 8                 | -0.322848000 | 1.591735000  | -0.299855000 |

---
